# Supplementary material for: A NMR method for relative stereochemical assignments of the tricyclic core of cephalosporolides, penisporolides and related synthetic analogues
Source: Royal Society of Chemistry journal article supplement (doi:10.1039/c6qo00556j), 2016-10-26

## Electronic Supplementary Information

### NMR Method for Relative Stereochemical Assignments of the Tricyclic Core of Cephalosporolides, Penisporolides and Related Synthetic Analogues

*Jian Wang and Rongbiao Tong \**

[rtong@ust.hk](mailto:rtong@ust.hk)

## Table of Contents

|                                                                                    |     |
|------------------------------------------------------------------------------------|-----|
| General Information.....                                                           | S-2 |
| NMR data of 24 SAFLs <b>A1–D6</b> .....                                            | S-3 |
| NMR data of natural products and synthetic compounds <b>A7–D14</b> .....           | S-6 |
| Copies of <sup>1</sup> H- and <sup>13</sup> C-NMR spectra of Ascospiroketal B..... | S-8 |

## General Information:

$^1\text{H}$  and  $^{13}\text{C}$  NMR spectra and data used in this study were reported in the literature with deuterated chloroform as the solvent.

Table S-1: Analysis results of  $^1\text{H}$  NMR data of compounds **A1** to **D6**<sup>1</sup>

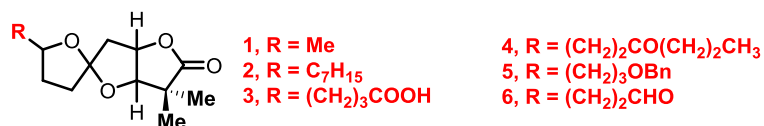

|                       | SAFL-A                                                                                 | SAFL-B                                                                                             | SAFL-C                                                                                             | SAFL-D                                                                                 |
|-----------------------|----------------------------------------------------------------------------------------|----------------------------------------------------------------------------------------------------|----------------------------------------------------------------------------------------------------|----------------------------------------------------------------------------------------|
| H4 (SSC)              | A1: 5.10, t<br>A2: 5.10, t<br>A3: 5.13, t<br>A4: 5.10, t<br>A5: 5.10, t<br>A6: 5.11, t | B1: 5.02, ddd<br>B2: 5.02, ddd<br>B3: 5.02, ddd<br>B4: 5.01, ddd<br>B5: 5.01, ddd<br>B6: 5.01, ddd | C1: 5.02, ddd<br>C2: 5.02, ddd<br>C3: 5.02, ddd<br>C4: 5.02, ddd<br>C5: 5.02, ddd<br>C6: 5.01, ddd | D1: 5.08, t<br>D2: 5.08, t<br>D3: 5.09, t<br>D4: 5.08, t<br>D5: 5.07, t<br>D6: 5.09, t |
|                       | average: 5.11                                                                          | average: 5.02                                                                                      | average: 5.02                                                                                      | average: 5.08                                                                          |
|                       | SD: 0.012                                                                              | SD: 0.005                                                                                          | SD: 0.004                                                                                          | SD: 0.008                                                                              |
| H5 ( $\Delta\delta$ ) | A1: 0.33<br>A2: 0.34<br>A3: 0.34<br>A4: 0.33<br>A5: 0.32<br>A6: 0.32                   | B1: 0.14<br>B2: 0.15<br>B3: 0.15<br>B4: 0.14<br>B5: 0.15<br>B6: 0.13                               | C1: 0.15<br>C2: 0.16<br>C3: 0.15<br>C4: 0.15<br>C5: 0.15<br>C6: 0.13                               | D1: 0.32<br>D2: 0.32<br>D3: 0.33<br>D4: 0.32<br>D5: 0.32<br>D6: 0.31                   |
|                       | average: 0.33                                                                          | average: 0.14                                                                                      | average: 0.15                                                                                      | average: 0.32                                                                          |
|                       | SD: 0.009                                                                              | SD: 0.008                                                                                          | SD: 0.010                                                                                          | SD: 0.006                                                                              |
| H8 ( $\Delta\delta$ ) | A1: 0.65<br>A2: 0.63<br>A3: 0.60<br>A4: 0.63<br>A5: 0.61<br>A6: 0.62                   | B1: 0.24<br>B2: 0.22<br>B3: 0.21<br>B4: 0.21<br>B5: 0.22<br>B6: 0.18                               | C1: 0.63<br>C2: 0.62<br>C3: 0.59<br>C4: 0.58<br>C5: 0.57<br>C6: 0.58                               | D1: 0.33<br>D2: 0.34<br>D3: 0.32<br>D4: 0.31<br>D5: 0.31<br>D6: 0.30                   |
|                       | average: 0.62                                                                          | average: 0.22                                                                                      | average: 0.60                                                                                      | average: 0.32                                                                          |
|                       | SD: 0.018                                                                              | SD: 0.020                                                                                          | SD: 0.024                                                                                          | SD: 0.015                                                                              |

<sup>1</sup> Wang, J.; Tong, R. *J. Org. Chem.* **2016**, *81*, 4325.

Table S-2: <sup>13</sup>C-NMR data of compounds **A1–D1**<sup>1</sup>

| position | A1     | B1     | C1     | D1     | Mean   | SD   |
|----------|--------|--------|--------|--------|--------|------|
| 1        | 180.91 | 181.00 | 180.89 | 180.73 | 180.88 | 0.11 |
| 2        | 44.28  | 44.46  | 44.44  | 44.49  | 44.42  | 0.09 |
| 3        | 86.69  | 85.06  | 85.22  | 87.02  | 86.00  | 1.00 |
| 4        | 80.00  | 80.38  | 80.52  | 79.87  | 80.19  | 0.31 |
| 5        | 41.76  | 41.95  | 42.52  | 41.75  | 42.00  | 0.36 |
| 6        | 115.13 | 115.48 | 115.62 | 115.26 | 115.37 | 0.22 |
| 7        | 34.67  | 37.47  | 35.85  | 36.64  | 36.16  | 1.19 |
| 8        | 31.40  | 32.38  | 31.91  | 32.37  | 32.02  | 0.46 |
| 9        | 75.46  | 67.97  | 74.89  | 77.70  | 74.01  | 4.20 |

Table S-3: <sup>13</sup>C-NMR data of compounds **A2–D2**<sup>1</sup>

| position | A2     | B2     | C2     | D2     | Mean   | SD   |
|----------|--------|--------|--------|--------|--------|------|
| 1        | 180.75 | 181.01 | 180.93 | 180.59 | 180.82 | 0.19 |
| 2        | 44.22  | 44.42  | 44.46  | 44.50  | 44.40  | 0.12 |
| 3        | 86.70  | 85.02  | 85.20  | 87.07  | 86.00  | 1.04 |
| 4        | 79.93  | 80.82  | 80.57  | 81.91  | 80.81  | 0.83 |
| 5        | 41.80  | 41.86  | 42.37  | 41.64  | 41.92  | 0.32 |
| 6        | 114.94 | 115.21 | 115.46 | 115.07 | 115.17 | 0.22 |
| 7        | 34.47  | 37.00  | 35.67  | 36.31  | 36.08  | 0.74 |
| 8        | 29.86  | 30.62  | 30.03  | 30.83  | 30.34  | 0.46 |
| 9        | 79.62  | 80.42  | 79.00  | 79.79  | 79.71  | 0.58 |

Table S-4: <sup>13</sup>C-NMR data of compounds **A3–D3**<sup>1</sup>

| position | A3     | B3     | C3     | D3     | Mean   | SD   |
|----------|--------|--------|--------|--------|--------|------|
| 1        | 181.43 | 180.94 | 180.88 | 181.12 | 181.09 | 0.25 |
| 2        | 44.47  | 44.43  | 44.46  | 44.72  | 44.52  | 0.13 |
| 3        | 86.71  | 85.10  | 85.27  | 87.11  | 86.05  | 1.01 |
| 4        | 80.24  | 80.36  | 80.50  | 81.46  | 80.64  | 0.56 |
| 5        | 41.87  | 41.81  | 42.31  | 41.67  | 41.92  | 0.28 |
| 6        | 115.23 | 115.33 | 115.55 | 115.26 | 115.34 | 0.14 |
| 7        | 34.34  | 36.83  | 35.52  | 36.21  | 35.73  | 1.07 |
| 8        | 30.11  | 30.59  | 30.04  | 30.92  | 30.42  | 0.42 |
| 9        | 79.38  | 80.14  | 78.31  | 80.04  | 79.47  | 0.84 |

Table S-5: <sup>13</sup>C-NMR data of compounds **A4–D4**<sup>1</sup>

| position | A4     | B4     | C4     | D4     | Mean   | SD   |
|----------|--------|--------|--------|--------|--------|------|
| 1        | 180.86 | 180.87 | 180.81 | 180.78 | 180.83 | 0.04 |
| 2        | 44.76  | 44.83  | 44.79  | 44.82  | 44.80  | 0.03 |
| 3        | 86.59  | 85.11  | 85.30  | 87.05  | 86.01  | 0.95 |
| 4        | 79.89  | 80.32  | 80.45  | 80.57  | 80.31  | 0.30 |
| 5        | 41.74  | 41.76  | 42.23  | 41.55  | 41.82  | 0.29 |
| 6        | 114.92 | 115.34 | 115.60 | 115.13 | 115.25 | 0.29 |
| 7        | 34.24  | 36.96  | 35.58  | 36.13  | 35.73  | 1.14 |
| 8        | 30.14  | 30.82  | 30.00  | 30.93  | 30.47  | 0.47 |
| 9        | 78.45  | 79.74  | 78.01  | 79.77  | 78.99  | 0.90 |

Table S-6: <sup>13</sup>C-NMR data of compounds **A5–D5**<sup>1</sup>

| position | A5     | B5     | C5     | D5     | Mean   | SD   |
|----------|--------|--------|--------|--------|--------|------|
| 1        | 180.77 | 180.99 | 180.92 | 180.64 | 180.83 | 0.16 |
| 2        | 44.23  | 44.40  | 44.45  | 44.53  | 44.40  | 0.13 |
| 3        | 86.69  | 85.01  | 85.21  | 87.08  | 86.00  | 1.04 |
| 4        | 79.91  | 80.43  | 80.53  | 81.52  | 80.60  | 0.67 |
| 5        | 41.78  | 41.81  | 42.31  | 41.63  | 41.88  | 0.30 |
| 6        | 115.01 | 115.24 | 115.51 | 115.15 | 115.23 | 0.21 |
| 7        | 34.41  | 36.93  | 35.60  | 36.27  | 35.80  | 1.08 |
| 8        | 29.87  | 30.59  | 29.99  | 30.85  | 30.33  | 0.47 |
| 9        | 79.33  | 80.39  | 78.62  | 79.79  | 79.53  | 0.75 |

Table S-7: <sup>13</sup>C-NMR data of compounds **A6–D6**<sup>1</sup>

| position | A6     | B6     | C6     | D6     | Mean   | SD   |
|----------|--------|--------|--------|--------|--------|------|
| 1        | 180.87 | 180.80 | 180.78 | 180.75 | 180.80 | 0.05 |
| 2        | 44.29  | 44.48  | 44.39  | 44.57  | 44.43  | 0.12 |
| 3        | 86.65  | 85.25  | 85.23  | 87.00  | 86.03  | 0.93 |
| 4        | 79.86  | 80.28  | 80.37  | 80.17  | 80.17  | 0.22 |
| 5        | 41.68  | 41.77  | 41.99  | 41.46  | 41.73  | 0.22 |
| 6        | 114.95 | 115.47 | 115.55 | 115.15 | 115.28 | 0.28 |
| 7        | 34.26  | 37.02  | 35.47  | 36.08  | 35.71  | 1.16 |
| 8        | 29.94  | 30.41  | 29.76  | 30.81  | 30.23  | 0.47 |
| 9        | 78.12  | 79.49  | 77.56  | 79.74  | 78.73  | 1.05 |

Table S-8: Mean of chemical shifts of different carbons in compounds **A1–D6** with the same configurations

| Position | A      | B      | C      | D      | SD*   |
|----------|--------|--------|--------|--------|-------|
| 1        | 180.93 | 180.94 | 180.87 | 180.77 | 0.078 |
| 2        | 44.38  | 44.50  | 44.50  | 44.61  | 0.094 |
| 3        | 86.67  | 85.09  | 85.24  | 87.06  | 0.996 |
| 4        | 79.97  | 80.43  | 80.49  | 80.92  | 0.389 |
| 5        | 41.77  | 41.83  | 42.29  | 41.62  | 0.289 |
| 6        | 115.03 | 115.35 | 115.55 | 115.17 | 0.225 |
| 7        | 34.40  | 37.04  | 35.62  | 36.27  | 1.118 |
| 8        | 30.22  | 30.90  | 30.29  | 31.12  | 0.446 |
| 9        | 78.39  | 78.03  | 77.73  | 79.47  | 0.760 |

Table S-9: SD of chemical shifts of different carbons in compounds **A1–D6** with the same configurations

| Position | SD   |      |      |      | $\sigma$ |
|----------|------|------|------|------|----------|
|          | A    | B    | C    | D    |          |
| 1        | 0.25 | 0.08 | 0.06 | 0.19 | 0.54     |
| 2        | 0.21 | 0.16 | 0.15 | 0.13 | 0.58     |
| 3        | 0.04 | 0.09 | 0.04 | 0.04 | 19.0     |
| 4        | 0.14 | 0.20 | 0.07 | 0.83 | 1.25     |
| 5        | 0.06 | 0.07 | 0.18 | 0.10 | 2.82     |
| 6        | 0.12 | 0.11 | 0.06 | 0.08 | 2.43     |
| 7        | 0.16 | 0.22 | 0.13 | 0.20 | 6.30     |
| 8        | 0.59 | 0.74 | 0.80 | 0.62 | 0.65     |
| 9        | 1.55 | 4.94 | 1.48 | 0.87 | 0.34     |

$$\sigma = SD^* / [(SD(A) + SD(B) + SD(C) + SD(D)) / 4]$$

Table S-10: NMR data of compounds **A7–D7**<sup>1</sup>

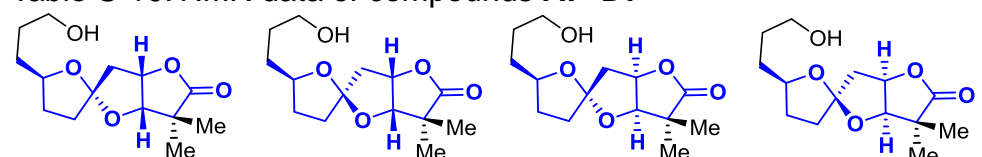

| entry            | A7      | B7        | C7        | D7      |
|------------------|---------|-----------|-----------|---------|
| $\delta_5$       | 5.10, t | 5.02, ddd | 5.02, ddd | 5.09, t |
| $\Delta\delta_5$ | 0.32    | 0.13      | 0.14      | 0.32    |
| $\Delta\delta_8$ | 0.60    | 0.19      | 0.52      | 0.28    |
| $\delta_{C3}$    | 86.66   | 85.24     | 85.33     | 87.03   |
| $\delta_{C7}$    | 34.32   | 37.03     | 35.58     | 36.23   |
| results          | ✓       | ✓         | ✓         | ✓       |

Table S-11: NMR data of compounds **A8–D9**<sup>2</sup>

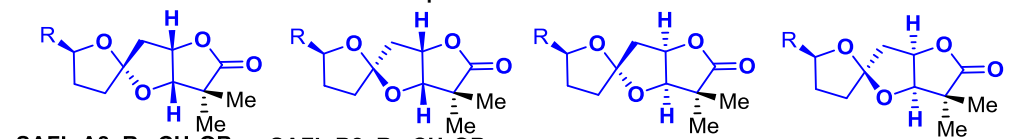

| entry            | A8      | B8                       | C8                       | D8                       | A9          | B9                       |
|------------------|---------|--------------------------|--------------------------|--------------------------|-------------|--------------------------|
| $\delta_4$       | 5.10, t | 5.00, ddd                | 5.02, ddd                | 5.06, t                  | 5.14, t     | 5.05, ddd                |
| $\Delta\delta_5$ | 0.33    | 0.23                     | 0.22                     | 0.33                     | 0.31        | 0.08                     |
| $\Delta\delta_8$ | 0.2~0.4 | 0.20                     | 0.30                     | 0.2*                     | 0.1~0.2     | 0.1~0.2                  |
| $\delta_{C3}$    | 86.9    | 85.1 <sup>#</sup> (79.0) | 85.3 <sup>#</sup> (77.7) | 87.3 <sup>#</sup> (79.7) | 86.8        | 85.4 <sup>#</sup> (80.9) |
| $\delta_{C7}$    | 34.2    | 36.1                     | 35.2                     | 36.0                     | 34.5        | 37.2                     |
| results          | ✓       | ✓                        | ✓                        | ✓                        | CNMR rule ✓ | CNMR rule ✓              |

\* wrong assignment of H8; <sup>#</sup> wrong assignment of C3 or C7

<sup>2</sup> Finch, O. C.; Furkert, D. P.; Brimble, M. A. *Tetrahedron* **2014**, *70*, 590.

Table S-12: NMR data of compounds **C10–C14**, **D11**, **D13**, **D14**<sup>3</sup>

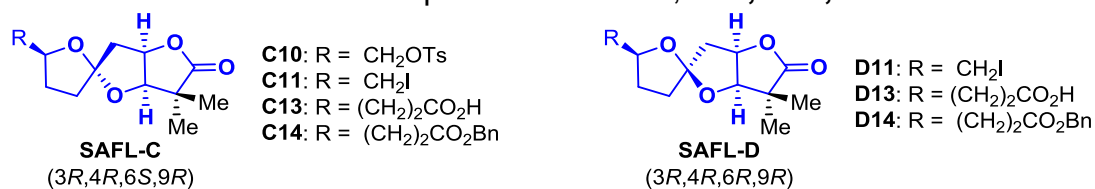

| entry           | C10           | C11           | C13           | C14           | D11         | D13         | D14         |
|-----------------|---------------|---------------|---------------|---------------|-------------|-------------|-------------|
| δ <sub>4</sub>  | 4.99<br>(ddd) | 5.05<br>(ddd) | 5.03<br>(ddd) | 5.01<br>(ddd) | 5.07<br>(t) | 5.08<br>(t) | 5.09<br>(t) |
| Δδ <sub>5</sub> | 0.15          | 0.21          | 0.13          | 0.15          | 0.34        | 0.32        | 0.31        |
| Δδ <sub>8</sub> | 0.54          | 0.55          | 0.53          | 0.57          | 0.32        | 0.32        | 0.31        |
| δ <sub>C3</sub> | 85.57         | 85.61         | 85.37         | 85.30         | 87.63       | 86.90       | 87.16       |
| δ <sub>C7</sub> | 35.04         | 35.47         | 35.62         | 35.59         | 36.55       | 36.12       | 36.31       |
| results         | ✓             | ✓             | ✓             | ✓             | ✓           | ✓           | ✓           |

Table S-13: NMR data of compounds **A12–D12**<sup>4</sup>

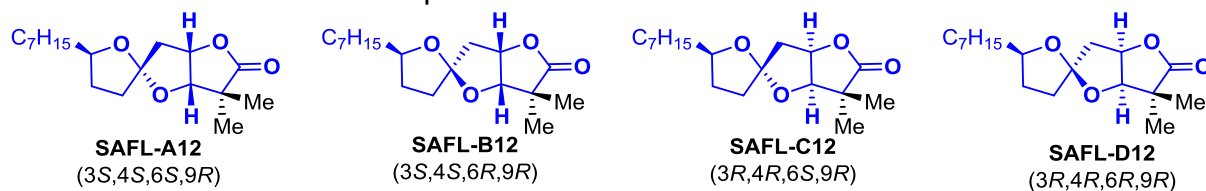

| entry           | C12 <sup>3a</sup> | D12 <sup>3a</sup> | C12 <sup>3b</sup> | D12 <sup>3b</sup> | A12 <sup>4a, 4b</sup> | B12 <sup>4a, 4b</sup> | C12 <sup>4a, 4b</sup> | D12 <sup>4a, 4b</sup> |
|-----------------|-------------------|-------------------|-------------------|-------------------|-----------------------|-----------------------|-----------------------|-----------------------|
| δ <sub>4</sub>  | 5.03<br>(ddd)     | 5.08<br>(t)       | 5.03<br>(ddd)     | 5.07<br>(t)       | 5.10<br>(t)           | 5.02<br>(ddd)         | 5.03<br>(ddd)         | 5.07<br>(t)           |
| Δδ <sub>5</sub> | 0.15              | 0.32              | 0.15              | 0.31              | 0.32                  | 0.15                  | 0.16                  | 0.32                  |
| Δδ <sub>8</sub> | 0.62              | 0.33              | 0.61              | 0.32              | 0.63                  | 0.21                  | 0.61                  | 0.32                  |
| δ <sub>C3</sub> | 85.17             | 87.07             | 85.21             | 87.05             | 86.72                 | 84.97                 | 85.22                 | 87.10                 |
| δ <sub>C7</sub> | 35.65             | 36.31             | 35.68             | 37.38             | 34.59                 | 37.20                 | 35.70                 | 36.34                 |
| results         | ✓                 | ✓                 | ✓                 | ✓                 | ✓                     | ✓                     | ✓                     | ✓                     |

<sup>3</sup> (a) Fernandes, R. A.; Halle, M. B. *Asian J. Org. Chem.* **2013**, 2, 593. (b) Li, J.; Zhao, C.; Liu, J.; Du, Y. *Tetrahedron* **2015**, 71, 3885.

<sup>4</sup> (a) Tlais, S. F.; Dudley, G. B. *Beistein J. Org. Chem.* **2012**, 8, 1287. (b) Tlais, S. F.; Dudley, G. B. *Org. Lett.* **2010**, 12, 4698. For samples of Fernandes, R. A. and Du, Y. see 3a and 3b respectively.

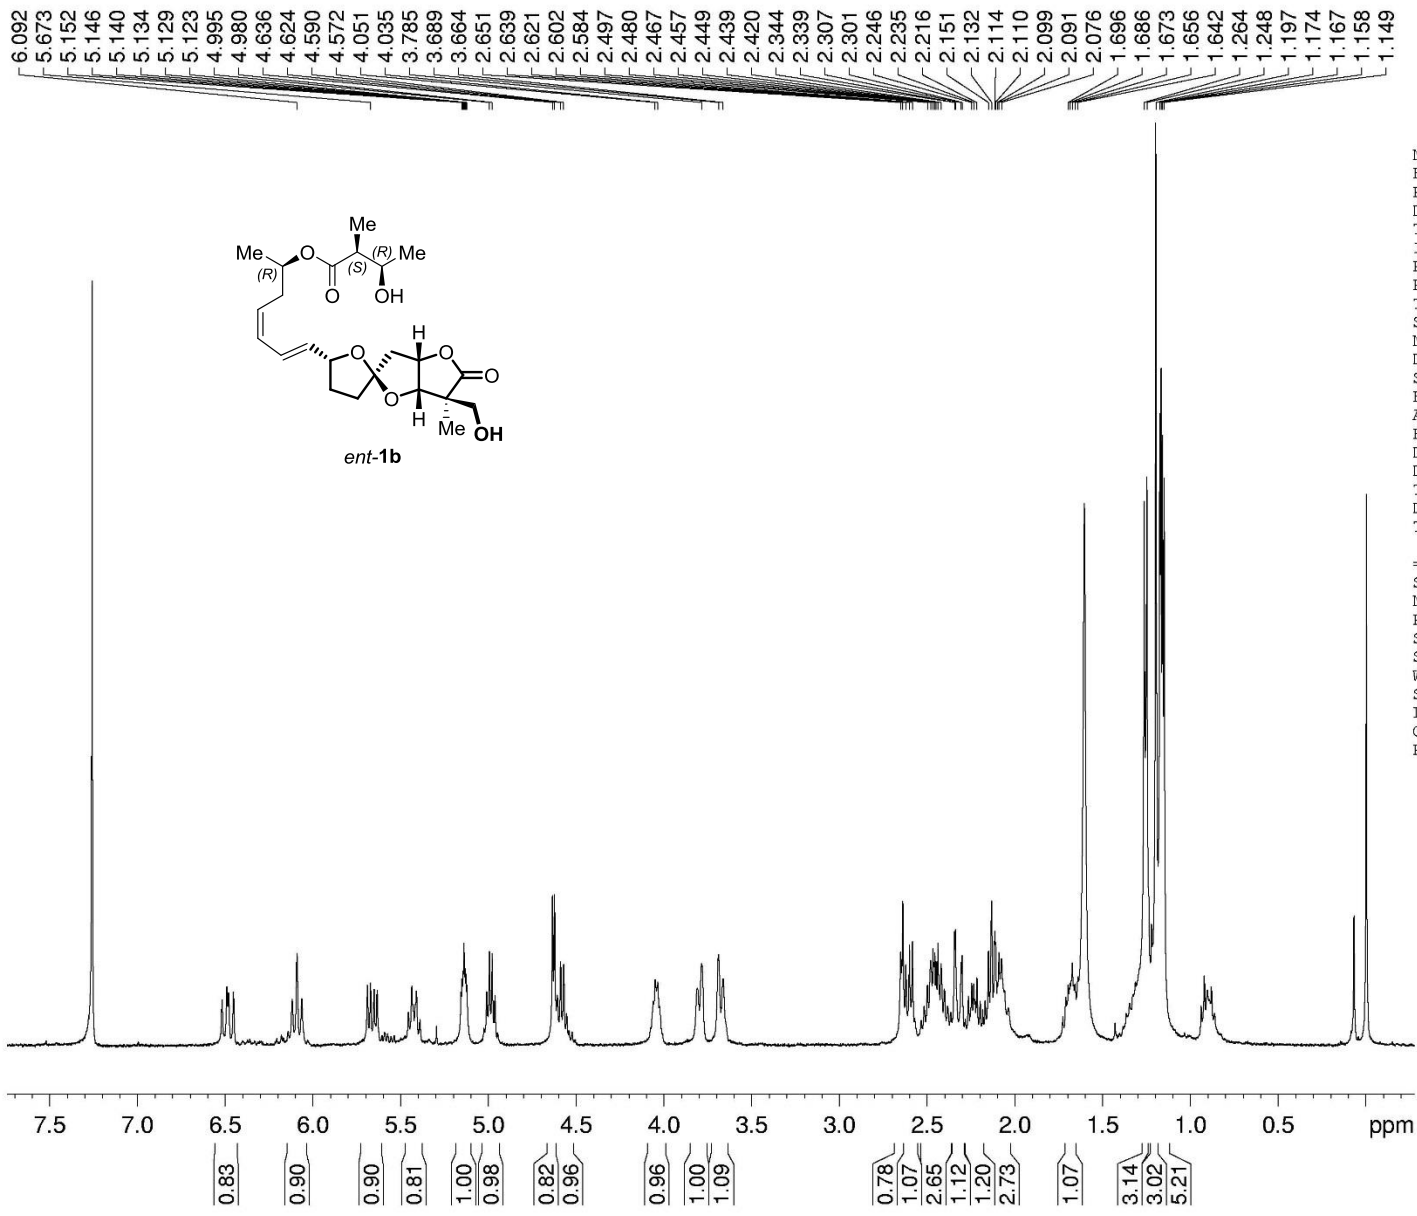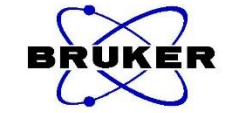

```

NAME      wjascospiroketal B-RSR
EXPNO     2
PROCNO    1
Date_     20160607
Time      23.51
INSTRUM   spect
PROBHD    5 mm PABBO BB/
PULPROG   zg30
TD         65536
SOLVENT   CDC13
NS         16
DS         2
SWH        8012.820 Hz
FIDRES     0.122266 Hz
AQ         4.0894966 sec
RG         187.77
DW         62.400 usec
DE         6.50 usec
TE         299.9 K
D1         1.00000000 sec
TD0        1

===== CHANNEL f1 =====
SFO1      400.1324710 MHz
NUC1       1H
P1         14.50 usec
SI         65536
SF         400.1300093 MHz
WDW        EM
SSB        0
LB         0.30 Hz
GB         0
PC         1.00
  
```



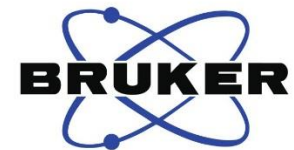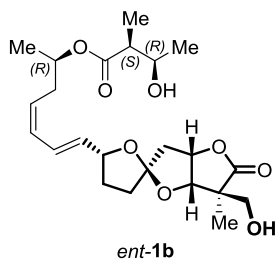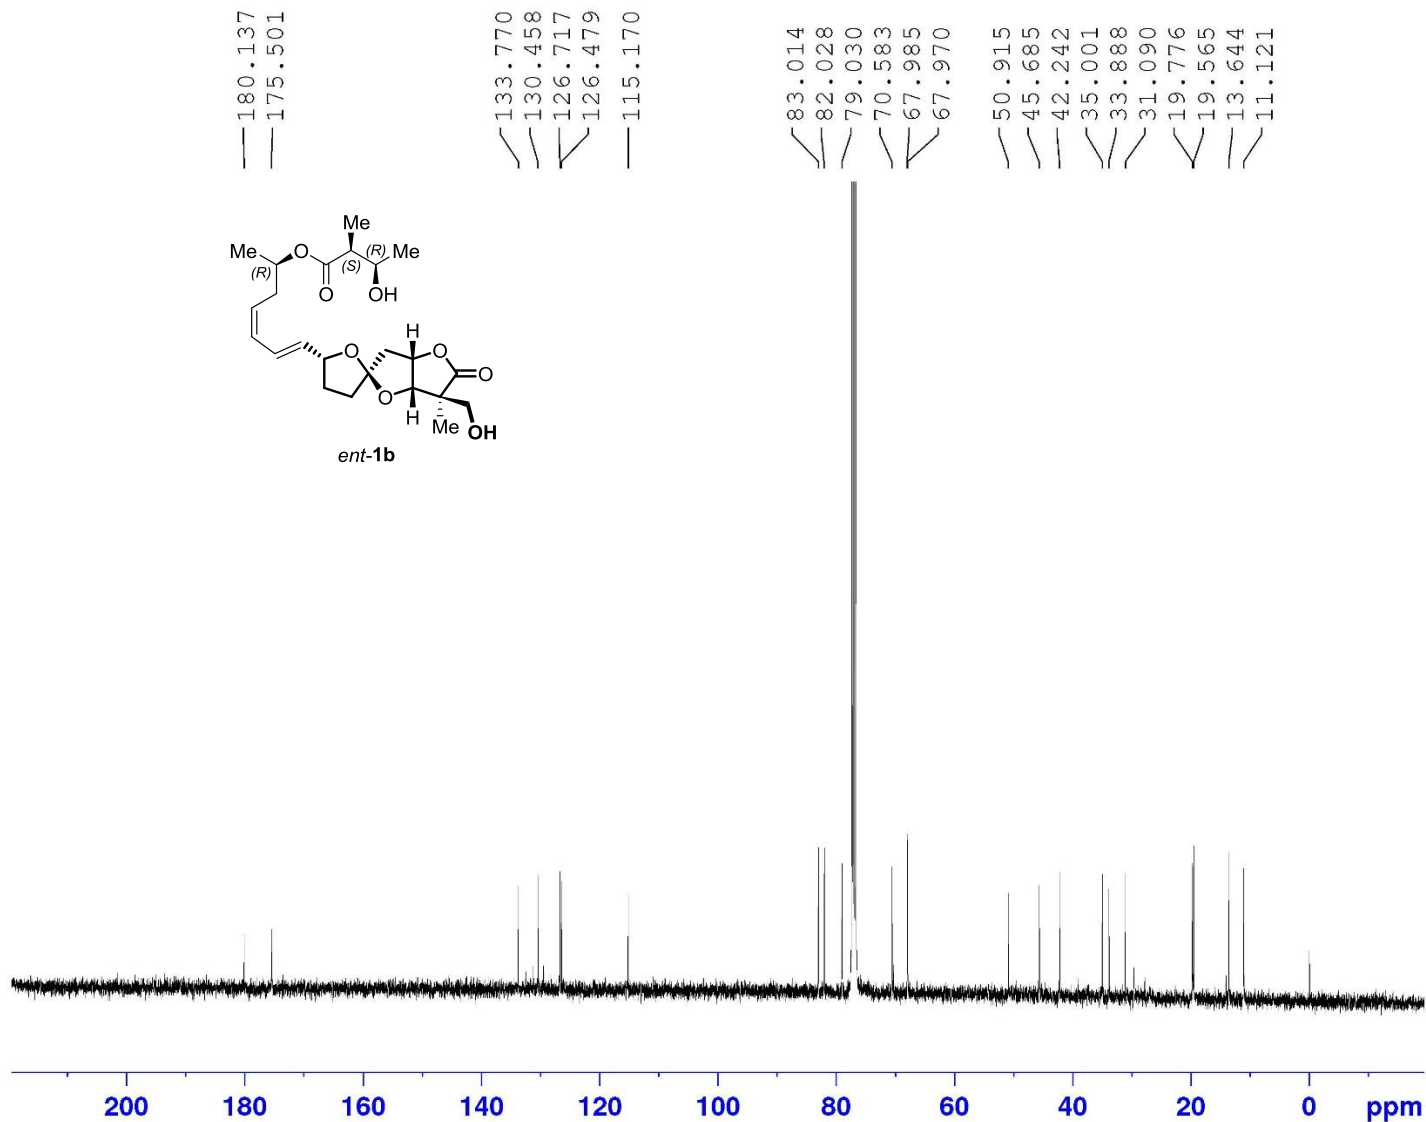

Current Data Parameters  
 NAME wjascospiroketal B-RSR  
 EXPNO 3  
 PROCNO 1

F2 - Acquisition Parameters  
 Date\_ 20160608  
 Time 0  
 INSTRUM spect  
 PROBHD 5 mm PABBO BB/  
 PULPROG zgpg30  
 TD 65536  
 SOLVENT CDCl3  
 NS 10069  
 DS 2  
 SWH 24038.461 Hz  
 FIDRES 0.366798 Hz  
 AQ 1.3631488 sec  
 RG 196.92  
 DW 20.800 usec  
 DE 6.50 usec  
 TE 300.6 K  
 D1 2.00000000 sec  
 D11 0.03000000 sec  
 TD0 1

===== CHANNEL f1 =====  
 SFO1 100.6228298 MHz  
 NUC1 13C  
 P1 9.70 usec  
 PLW1 46.98899841 W

===== CHANNEL f2 =====  
 SFO2 400.1316005 MHz  
 NUC2 1H  
 CPDPRG[2] waltz16  
 PCPD2 90.00 usec  
 PLW2 11.99499989 W  
 PLW12 0.34213999 W  
 PLW13 0.27713001 W

F2 - Processing parameters  
 SI 32768  
 SF 100.6127695 MHz  
 NDW EM  
 SSB 0  
 LB 1.00 Hz  
 GB 0  
 PC 1.40

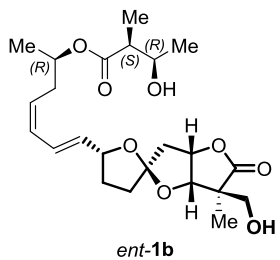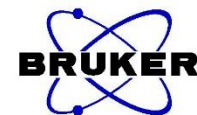

```

NAME      wjascospiroketal B-RER
EXPNO     6
PROCNO    1
Date_     20160608
Time      13.32
INSTRUM   spect
PROBHD    5 mm PABBO BB/
PULPROG   hsqcetgp
TD         2048
SOLVENT   CDCl3
NS         16
DS         16
SWH        5197.505 Hz
FIDRES     2.537844 Hz
AQ         0.1979676 sec
RG         196.92
DW         96.200 usec
DE         6.50 usec
TE         300.0 K
CNST2     145.000000
D0         0.0000000 sec
D1         1.5000000 sec
D4         0.00172414 sec
D11        0.03000000 sec
D16        0.00020000 sec
TMO       0.00000000 sec
ZGPTNS

```

```

===== CHANNEL f1 =====
SF01     400.1324008 MHz
NUC1      1H
P1        14.50 usec
P2        29.00 usec
PZ8       1000.00 usec
NU0        2
TD         59
SF01     100.6203 MHz
FIDRES    282.485870 Hz
SW        165.639 ppm
EnMODE    Echo-Antiecho
SI        1024
SF        400.1300000 MHz
WDW        QSINE
SSB        2
LB         0.00 Hz
GB         0
PC         1.40
SI        1024
MC2       echo-antiecho
SF        100.6127690 MHz
WDW        QSINE
SSB        2
LB         0.00 Hz
GB         0

```

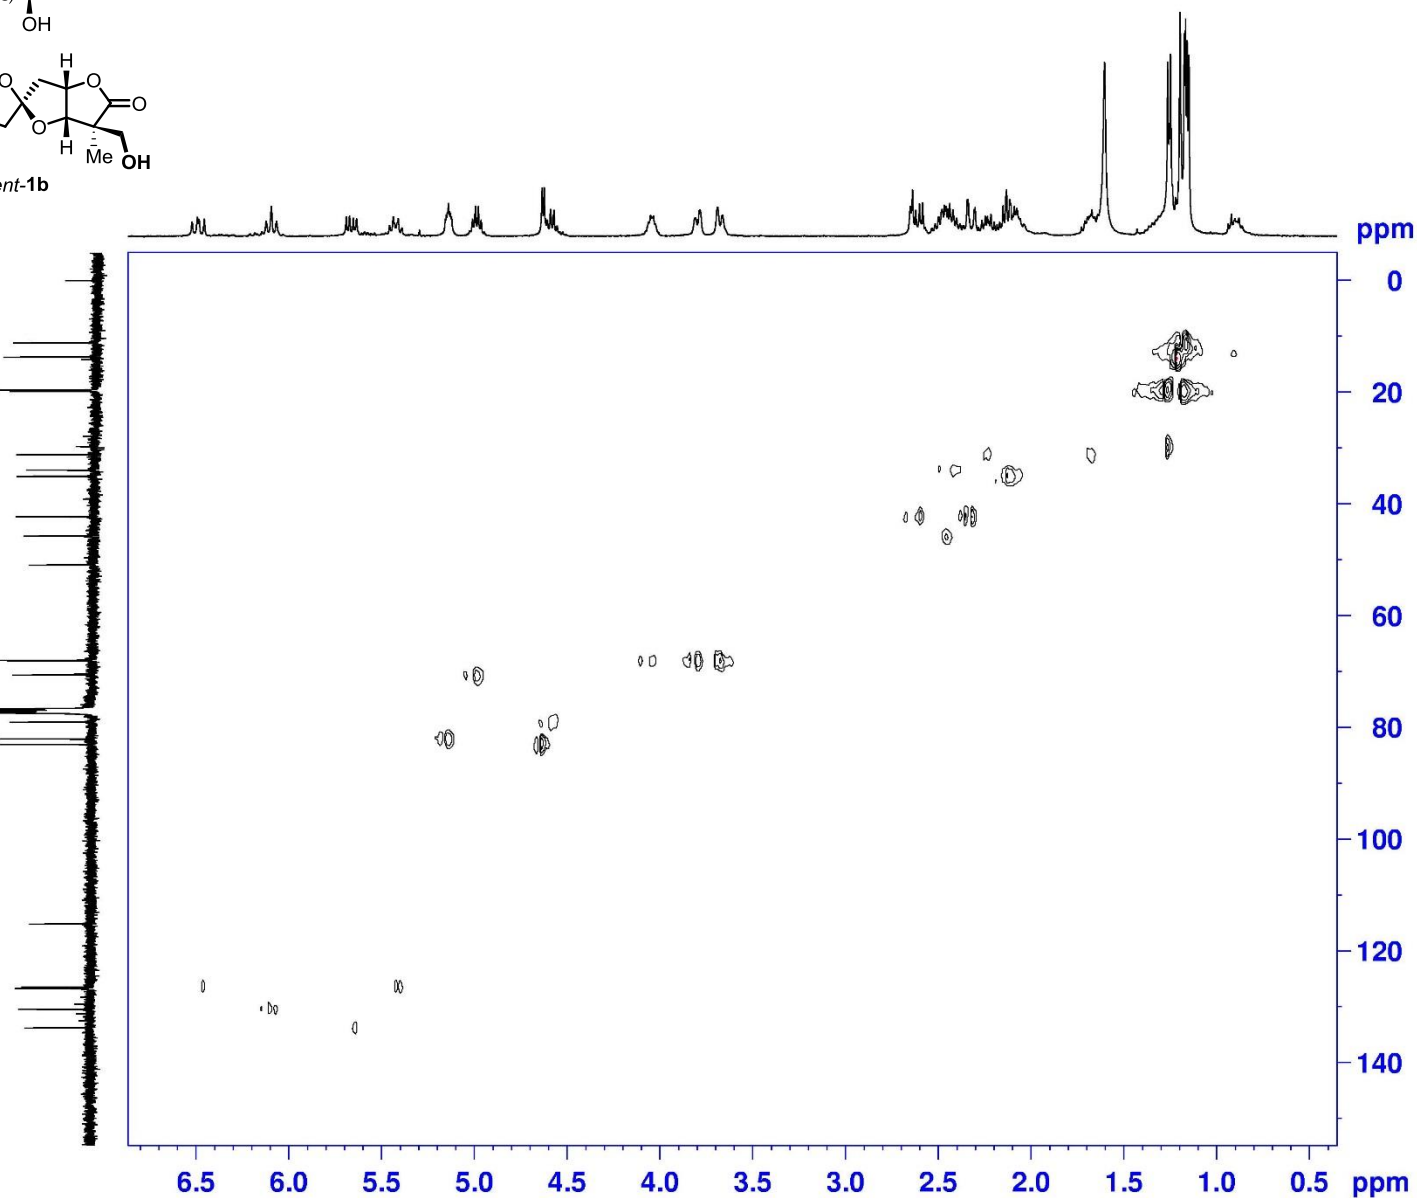

Supplement: c6qo00556j1.pdf [file c6qo00556j1.pdf]
